# Supplementary material for: Bushen Huoxue recipe attenuates early pregnancy loss via activating endometrial COX2-PGE2 angiogenic signaling in mice
Source: PubMed Central journal article supplement (PMC7809844; doi:10.1186/s12906-021-03201-9), 2021-01-14

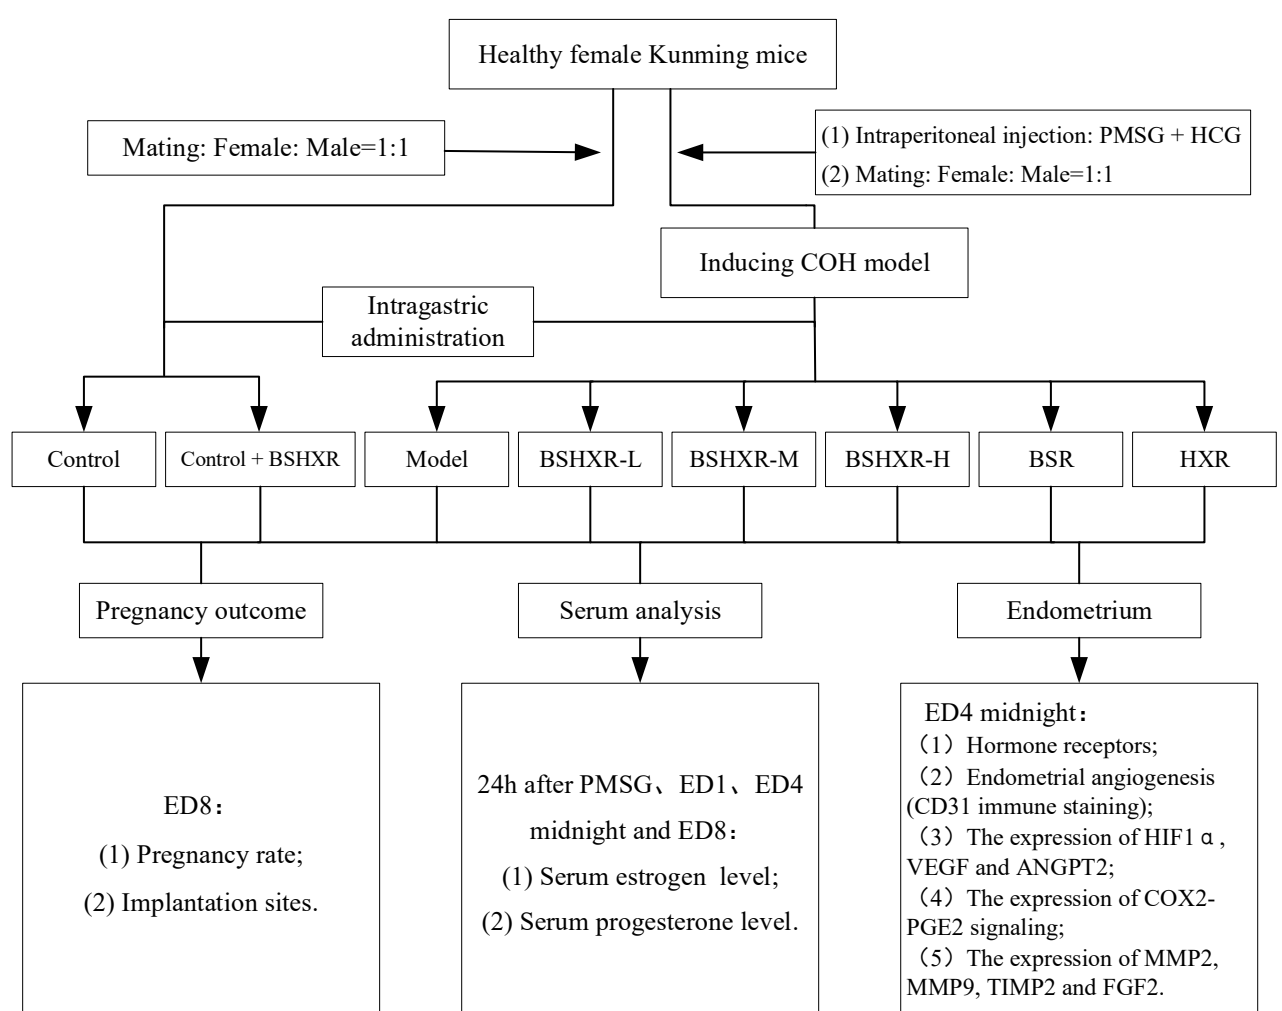

Supplement: 12906_2021_3201_MOESM2_ESM.pdf [file 12906_2021_3201_MOESM2_ESM.pdf]
